# Supplementary material
Source: publisher figshare collection journal article supplement (https://acs.figshare.com/ndownloader/files/11138330)
Supplement: Supplementary file 1 [file 11138330]

# Supporting Information

## **pH-Responsive Magnetic Mesoporous Silica-Based Nanoplatfom for Synergistic Photodynamic Therapy/Chemotherapy**

*Xiang-long Tang<sup>a</sup>, Feng Jing<sup>a</sup>, Ben-lan Lin<sup>a</sup>, Sheng Cui<sup>\*a</sup>, Ru-tong Yu<sup>b</sup>, Xiao-dong Shen<sup>\*a</sup> and Ting-wei Wang<sup>a</sup>*

<sup>a</sup>

College of Material Science and Engineering, Nanjing Tech University, Nanjing, 210009, China

<sup>b</sup>

Brain Hospital, Affiliated Hospital of Xuzhou Medical University, Xuzhou, 221002, China

### **Corresponding Author**

\*E-mail: [scui@njtech.edu.cn](mailto:scui@njtech.edu.cn), [xdshen@njtech.edu.cn](mailto:xdshen@njtech.edu.cn).

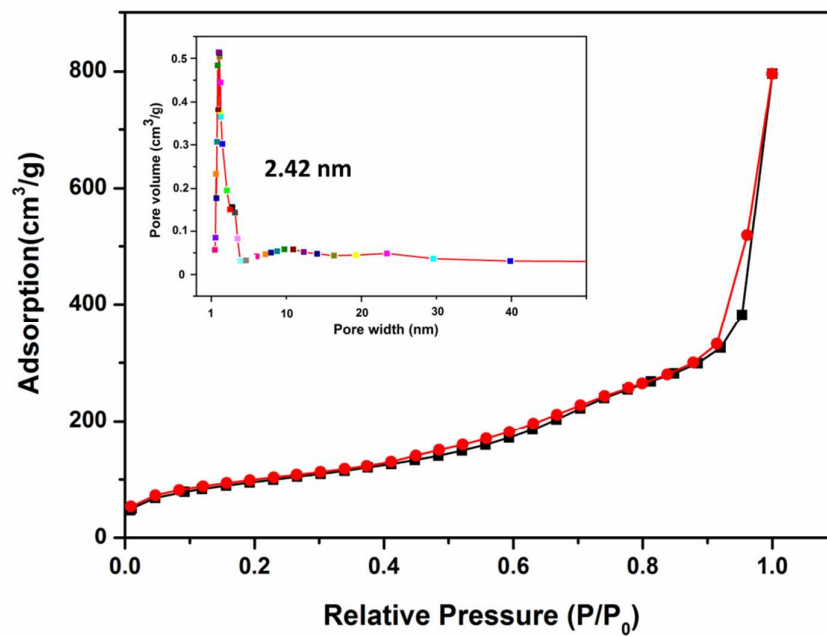

**Figure S1.** Nitrogen adsorption–desorption isotherms and pore size distribution for  $\text{Fe}_3\text{O}_4@m\text{SiO}_2$  nanoparticles

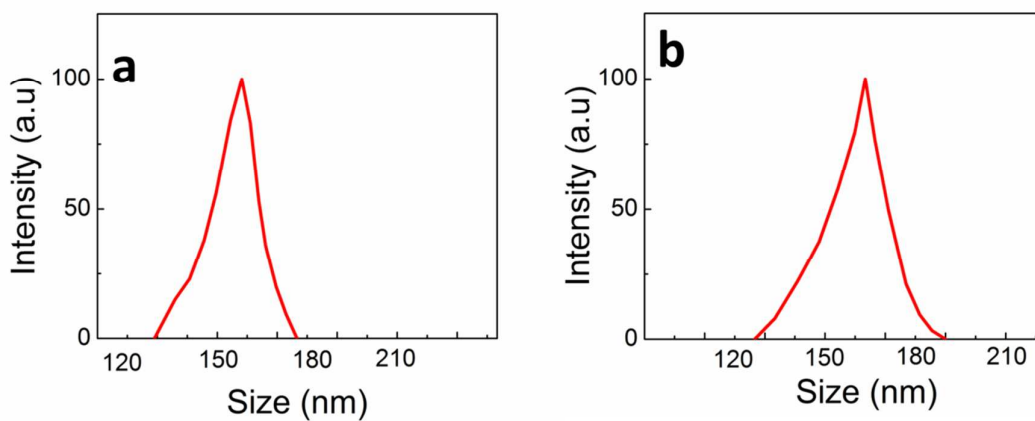

**Figure S2.** Size distribution of  $\text{Fe}_3\text{O}_4@m\text{SiO}_2(\text{DOX})@HSA(\text{Ce6})$  nanopatform in PBS solution for (a) 24 h and (b) 48 h, respectively.

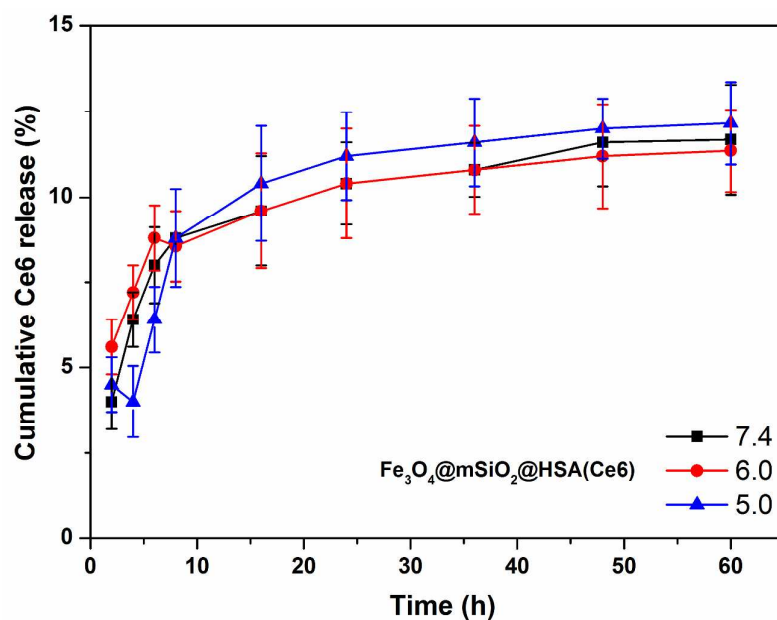

**Figure S3.** Release profile of  $\text{Fe}_3\text{O}_4@\text{mSiO}_2@\text{HSA}(\text{Ce6})$  in PBS buffer with different pH values.

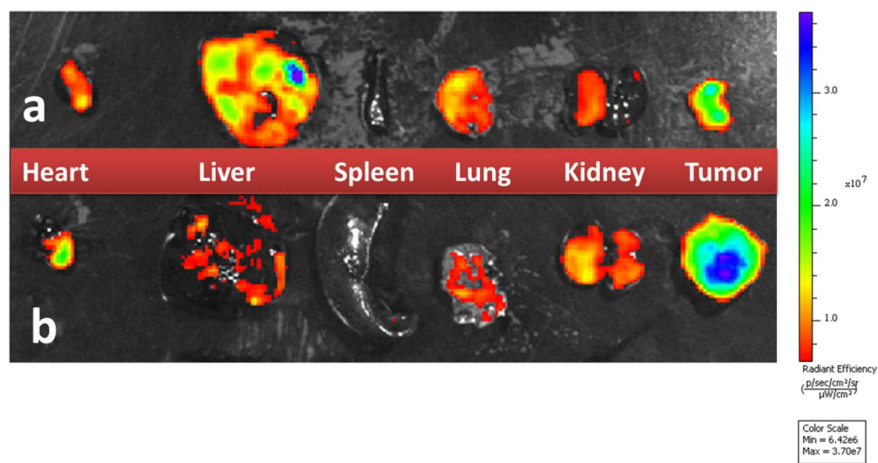

**Figure S4.** Accumulation of (a) free Ce6 and (b)  $\text{Fe}_3\text{O}_4@\text{mSiO}_2(\text{DOX})@\text{HSA}(\text{Ce6})$  in major organs and tumors after 24 h postinjection.

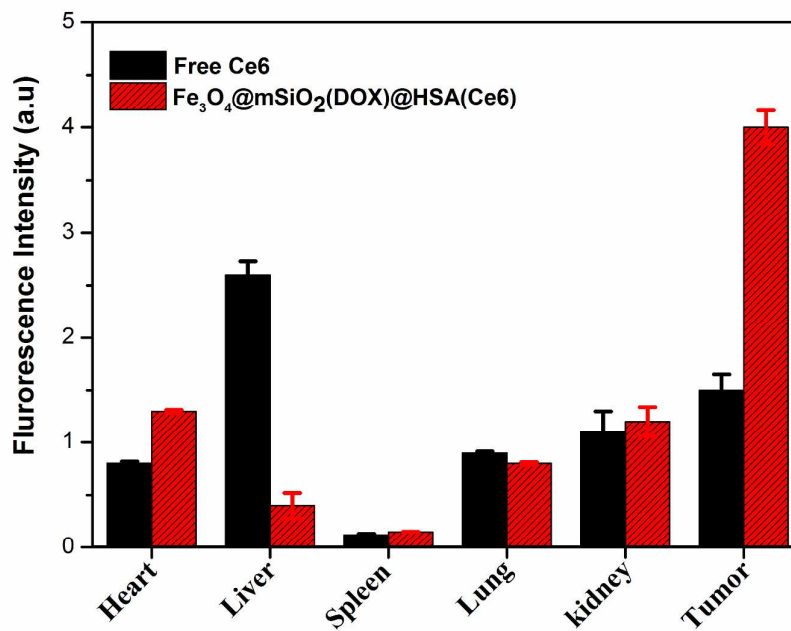

**Figure S5.** Quantitative analysis of Ce6 fluoresces in major organs and tumors after 24 h postinjection.
